# Supplementary material
Source: publisher figshare collection journal article supplement (https://sage.figshare.com/ndownloader/files/14993756)
Supplement: Supplementary file 1 [file 14993756]

**Supplementary Table 1. Most common procedures in patients admitted to ICU**

| <b>Procedure</b>                        | <b>Direct ICU Admission (n [%])</b> | <b>Indirect ICU Admission (n [%])</b> |
|-----------------------------------------|-------------------------------------|---------------------------------------|
| L18 Emergency Replacement Of Aneurysmal | 141 (11.0)                          | -                                     |
| H33 Excision Of Rectum                  | 132 (10.3)                          | 65 (14.7)                             |
| H07 Other Excision Of Right Hemicolon   | 88 (6.9)                            | 31 (7.0)                              |
| G52 Operations On Ulcer Of Duodenum     | 85 (6.6)                            | -                                     |
| T30 Opening Of Abdomen                  | 80 (6.2)                            | 31 (7.0)                              |
| H01 Emergency Excision Of Appendix      | -                                   | 31 (7.0)                              |
| G69 Excision Of Ileum                   | -                                   | 20 (4.5)                              |

**Supplementary Table 2. Factors associated with 30-day emergency reoperation.**

|                                      |                         | No 30d<br>reoperation | 30d<br>reoperation | Univariable regression<br>HR (95%CI) p-value | Multivariable<br>regression<br>HR (95%CI) p-value |
|--------------------------------------|-------------------------|-----------------------|--------------------|----------------------------------------------|---------------------------------------------------|
| n                                    |                         | 36142<br>(97.2%)      | 1031 (2.8%)        |                                              |                                                   |
| ICU admission<br>status              | No ICU admission        | 34404<br>(95.4%)      | 961 (93.2%)        | 0.64 (0.48, 0.87) 0.004                      | 0.75 (0.58, 0.96) 0.025                           |
|                                      | Direct ICU admission    | 1231 (3.4%)           | 54 (5.2%)          | 1 (reference)                                | 1 (reference)                                     |
|                                      | Indirect ICU admission  | 427 (1.2%)            | 16 (1.6%)          | 0.86 (0.56, 1.31) 0.472                      | 0.85 (0.57, 1.28) 0.445                           |
| Age (years)                          | Mean (SD); per 10 years | 46.8 (20.4)           | 51.2 (20.7)        | 1.11 (1.08, 1.14) <0.001                     | 1.02 (0.98, 1.06) 0.283                           |
| Sex                                  | Male                    | 21302<br>(58.9%)      | 582 (56.5%)        | 1 (reference)                                | 1 (reference)                                     |
|                                      | Female                  | 14840<br>(41.1%)      | 449 (43.5%)        | 1.11 (1.00, 1.23) 0.051                      | 1.02 (0.91, 1.15) 0.725                           |
| Comorbidity count<br>(Charlson)      | 0                       | 32761<br>(90.6%)      | 867 (84.1%)        | 1 (reference)                                | 1 (reference)                                     |
|                                      | 1                       | 2959 (8.2%)           | 137 (13.3%)        | 1.73 (1.54, 1.94) <0.001                     | 0.95 (0.86, 1.04) 0.239                           |
|                                      | 2                       | 364 (1.0%)            | 22 (2.1%)          | 2.24 (1.64, 3.05) <0.001                     | 0.91 (0.56, 1.48) 0.699                           |
|                                      | 3+                      | 58 (0.2%)             | 5 (0.5%)           | 3.20 (1.35, 7.59) 0.008                      | 0.99 (0.33, 2.95) 0.982                           |
| Deprivation index<br>quintile (SIMD) | 1 Least deprived        | 5523 (15.6%)          | 167 (16.3%)        | 1 (reference)                                | 1 (reference)                                     |
|                                      | 2                       | 6360 (17.9%)          | 185 (18.1%)        | 0.96 (0.69, 1.34) 0.828                      | 0.94 (0.67, 1.32) 0.720                           |
|                                      | 3                       | 7005 (19.8%)          | 185 (18.1%)        | 0.88 (0.72, 1.06) 0.172                      | 0.86 (0.70, 1.06) 0.153                           |
|                                      | 4                       | 7681 (21.7%)          | 227 (22.2%)        | 0.98 (0.83, 1.15) 0.791                      | 0.99 (0.84, 1.16) 0.883                           |
|                                      | 5 Most deprived         | 8881 (25.1%)          | 259 (25.3%)        | 0.97 (0.79, 1.18) 0.739                      | 0.99 (0.83, 1.18) 0.913                           |
| Prior elective<br>admission          | Mean (SD)               | 0.8 (1.6)             | 1.3 (2.1)          | 1.17 (1.15, 1.19) <0.001                     | 1.08 (1.06, 1.11) <0.001                          |
| Prior emergency<br>admission         | Mean (SD)               | 0.7 (1.2)             | 1.1 (1.5)          | 1.21 (1.17, 1.26) <0.001                     | 1.11 (1.05, 1.18) <0.001                          |
| Diagnosis                            | Other                   | 28180<br>(78.0%)      | 838 (81.3%)        | 1 (reference)                                | 1 (reference)                                     |
|                                      | Cancer                  | 2138 (5.9%)           | 92 (8.9%)          | 1.44 (1.11, 1.85) 0.005                      | 1.33 (1.04, 1.71) 0.025                           |
|                                      | Trauma/Injury           | 5824 (16.1%)          | 101 (9.8%)         | 0.59 (0.53, 0.65) <0.001                     | 0.67 (0.55, 0.83) <0.001                          |
| Procedure category                   | Upper digestive system  | 2208 (6.1%)           | 62 (6.0%)          | 0.69 (0.51, 0.93) 0.015                      | 0.62 (0.46, 0.83) 0.001                           |
|                                      | Lower digestive system  | 15269<br>(42.2%)      | 408 (39.6%)        | 0.65 (0.49, 0.87) 0.003                      | 0.70 (0.53, 0.94) 0.016                           |
|                                      | Another abdomen         | 4049 (11.2%)          | 113 (11.0%)        | 0.68 (0.42, 1.11) 0.121                      | 0.68 (0.43, 1.09) 0.108                           |
|                                      | Vascular                | 1674 (4.6%)           | 75 (7.3%)          | 1.08 (0.76, 1.54) 0.654                      | 0.82 (0.54, 1.24) 0.341                           |
|                                      | Soft tissue             | 8939 (24.7%)          | 208 (20.2%)        | 0.57 (0.41, 0.79) 0.001                      | 0.72 (0.52, 1.00) 0.047                           |
|                                      | Other                   | 4003 (11.1%)          | 165 (16.0%)        | 1 (reference)                                | 1 (reference)                                     |
|                                      | Minor                   | 6734 (18.7%)          | 188 (18.3%)        | 1 (reference)                                | 1 (reference)                                     |
| Operative<br>complexity              | Intermediate            | 16960<br>(47.0%)      | 425 (41.4%)        | 0.90 (0.70, 1.16) 0.420                      | 0.96 (0.73, 1.26) 0.777                           |
|                                      | Major                   | 7859 (21.8%)          | 240 (23.4%)        | 1.09 (0.71, 1.69) 0.690                      | 1.02 (0.70, 1.50) 0.900                           |
|                                      | Major+                  | 1696 (4.7%)           | 49 (4.8%)          | 1.03 (0.65, 1.64) 0.890                      | 0.88 (0.54, 1.41) 0.587                           |
|                                      | Complex major           | 2809 (7.8%)           | 125 (12.2%)        | 1.58 (1.12, 2.22) 0.009                      | 1.24 (0.85, 1.83) 0.266                           |
|                                      | Mon-Thu                 | 22228<br>(61.5%)      | 651 (63.1%)        | 1 (reference)                                | 1 (reference)                                     |
| Discharge date                       | Fri-Sun                 | 13914<br>(38.5%)      | 380 (36.9%)        | 0.93 (0.82, 1.06) 0.309                      | 0.97 (0.86, 1.09) 0.591                           |
|                                      | Dec-Feb                 | 8636 (23.9%)          | 279 (27.1%)        | 1 (reference)                                | 1 (reference)                                     |
| Season                               | Mar-May                 | 9131 (25.3%)          | 255 (24.7%)        | 0.87 (0.73, 1.03) 0.099                      | 0.85 (0.73, 1.00) 0.054                           |
|                                      | Jun-Aug                 | 9420 (26.1%)          | 268 (26.0%)        | 0.88 (0.78, 1.00) 0.043                      | 0.91 (0.81, 1.01) 0.087                           |
|                                      | Sep-Nov                 | 8955 (24.8%)          | 229 (22.2%)        | 0.80 (0.59, 1.06) 0.124                      | 0.79 (0.60, 1.04) 0.091                           |

**Supplementary Table 3. Factors associated with 30-day emergency readmission with complication.**

|                                      |                         | No 30d<br>complication | 30d complication | Univariable regression<br>HR (95%CI) p-value | Multivariable<br>regression<br>HR (95%CI) p-value |
|--------------------------------------|-------------------------|------------------------|------------------|----------------------------------------------|---------------------------------------------------|
| n                                    |                         | 36099 (97.1%)          | 1074 (2.9%)      |                                              |                                                   |
| ICU admission<br>status              | No ICU admission        | 34392 (95.5%)          | 973 (90.6%)      | 0.51 (0.42, 0.61) <0.001                     | 0.78 (0.66, 0.92) 0.003                           |
|                                      | Direct ICU admission    | 1216 (3.4%)            | 69 (6.4%)        | 1 (reference)                                | 1 (reference)                                     |
|                                      | Indirect ICU admission  | 411 (1.1%)             | 32 (3.0%)        | 1.36 (1.00, 1.83) 0.048                      | 1.38 (1.04, 1.83) 0.026                           |
| Age (years)                          | Mean (SD); per 10 years | 46.7 (20.4)            | 55.2 (20.8)      | 1.22 (1.19, 1.24) <0.001                     | 1.10 (1.08, 1.12) <0.001                          |
| Sex                                  | Male                    | 21299 (59.0%)          | 585 (54.5%)      | 1 (reference)                                | 1 (reference)                                     |
|                                      | Female                  | 14800 (41.0%)          | 489 (45.5%)      | 1.20 (1.09, 1.32) <0.001                     | 1.04 (0.93, 1.16) 0.532                           |
| Comorbidity<br>count (Charlson)      | 0                       | 32751 (90.7%)          | 877 (81.7%)      | 1 (reference)                                | 1 (reference)                                     |
|                                      | 1                       | 2933 (8.1%)            | 163 (15.2%)      | 2.04 (1.64, 2.54) <0.001                     | 0.97 (0.77, 1.21) 0.765                           |
|                                      | 2                       | 359 (1.0%)             | 27 (2.5%)        | 2.73 (1.71, 4.35) <0.001                     | 0.92 (0.57, 1.50) 0.746                           |
|                                      | 3+                      | 56 (0.2%)              | 7 (0.7%)         | 4.43 (3.02, 6.51) <0.001                     | 1.16 (0.77, 1.75) 0.470                           |
| Deprivation index<br>quintile (SIMD) | 1 Least deprived        | 5526 (15.6%)           | 164 (15.4%)      | 1 (reference)                                | 1 (reference)                                     |
|                                      | 2                       | 6343 (17.9%)           | 202 (19.0%)      | 1.07 (0.78, 1.48) 0.669                      | 1.09 (0.76, 1.56) 0.640                           |
|                                      | 3                       | 6974 (19.7%)           | 216 (20.3%)      | 1.04 (0.80, 1.35) 0.746                      | 1.07 (0.81, 1.42) 0.623                           |
|                                      | 4                       | 7674 (21.7%)           | 234 (22.0%)      | 1.03 (0.83, 1.28) 0.814                      | 1.06 (0.83, 1.36) 0.634                           |
|                                      | 5 Most deprived         | 8892 (25.1%)           | 248 (23.3%)      | 0.94 (0.76, 1.17) 0.585                      | 1.01 (0.79, 1.28) 0.949                           |
| Prior elective<br>admission          | Mean (SD)               | 0.8 (1.6)              | 1.4 (2.1)        | 1.20 (1.16, 1.23) <0.001                     | 1.04 (1.00, 1.08) 0.069                           |
| Prior emergency<br>admission         | Mean (SD)               | 0.7 (1.2)              | 1.2 (1.7)        | 1.30 (1.25, 1.35) <0.001                     | 1.20 (1.17, 1.24) <0.001                          |
| Diagnosis                            | Other                   | 28102 (77.8%)          | 916 (85.3%)      | 1 (reference)                                | 1 (reference)                                     |
|                                      | Cancer                  | 2146 (5.9%)            | 84 (7.8%)        | 1.19 (0.96, 1.49) 0.111                      | 0.82 (0.64, 1.06) 0.126                           |
|                                      | Trauma/Injury           | 5851 (16.2%)           | 74 (6.9%)        | 0.39 (0.34, 0.45) <0.001                     | 0.44 (0.36, 0.53) <0.001                          |
| Procedure<br>category                | Upper digestive system  | 2169 (6.0%)            | 101 (9.4%)       | 1.41 (1.08, 1.85) 0.012                      | 1.14 (0.80, 1.63) 0.473                           |
|                                      | Lower digestive system  | 15280 (42.3%)          | 397 (37.0%)      | 0.80 (0.64, 1.00) 0.052                      | 1.11 (0.91, 1.36) 0.316                           |
|                                      | Other abdomen           | 4049 (11.2%)           | 113 (10.5%)      | 0.86 (0.73, 1.01) 0.074                      | 0.73 (0.57, 0.93) 0.010                           |
|                                      | Vascular                | 1661 (4.6%)            | 88 (8.2%)        | 1.60 (1.32, 1.95) <0.001                     | 1.08 (0.85, 1.39) 0.520                           |
|                                      | Soft tissue             | 8904 (24.7%)           | 243 (22.6%)      | 0.84 (0.73, 0.97) 0.016                      | 1.09 (0.91, 1.30) 0.359                           |
|                                      | Other                   | 4036 (11.2%)           | 132 (12.3%)      | 1 (reference)                                | 1 (reference)                                     |
|                                      | Minor                   | 6854 (19.0%)           | 68 (6.4%)        | 1 (reference)                                | 1 (reference)                                     |
| Operative<br>complexity              | Intermediate            | 16891 (46.9%)          | 494 (46.2%)      | 2.92 (2.40, 3.56) <0.001                     | 3.33 (2.76, 4.01) <0.001                          |
|                                      | Major                   | 7810 (21.7%)           | 289 (27.0%)      | 3.68 (2.85, 4.77) <0.001                     | 3.62 (2.68, 4.88) <0.001                          |
|                                      | Major+                  | 1676 (4.7%)            | 69 (6.5%)        | 4.08 (3.24, 5.14) <0.001                     | 3.43 (2.57, 4.58) <0.001                          |
|                                      | Complex major           | 2785 (7.7%)            | 149 (13.9%)      | 5.27 (4.33, 6.43) <0.001                     | 3.77 (2.78, 5.11) <0.001                          |
| Discharge date                       | Mon-Thu                 | 22198 (61.5%)          | 681 (63.4%)      | 1(reference)                                 | 1(reference)                                      |
|                                      | Fri-Sun                 | 13901 (38.5%)          | 393 (36.6%)      | 0.92 (0.84, 1.01) 0.090                      | 0.98 (0.88, 1.08) 0.647                           |
| Season                               | Dec-Feb                 | 8631 (23.9%)           | 284 (26.4%)      | 1(reference)                                 | 1(reference)                                      |
|                                      | Mar-May                 | 9117 (25.3%)           | 269 (25.0%)      | 0.90 (0.74, 1.09) 0.283                      | 0.89 (0.73, 1.09) 0.264                           |
|                                      | Jun-Aug                 | 9416 (26.1%)           | 272 (25.3%)      | 0.88 (0.77, 1.01) 0.068                      | 0.91 (0.80, 1.03) 0.132                           |
|                                      | Sep-Nov                 | 8935 (24.8%)           | 249 (23.2%)      | 0.85 (0.75, 0.96) 0.010                      | 0.87 (0.75, 1.01) 0.069                           |

**Supplementary Table 4. Factors associated with emergency readmission rate over 3 year follow up period.**

|                                   |                        | Mean 3year<br>readmission<br>rate | Univariable regression<br>Adm RR (95%CI) p-value | Multivariable<br>regression<br>Adm RR (95%CI) p-<br>value |
|-----------------------------------|------------------------|-----------------------------------|--------------------------------------------------|-----------------------------------------------------------|
| ICU admission status              | No ICU admission       | 0.54 (0.01)                       | 0.44 (0.37, 0.52) <0.001                         | 0.83 (0.73, 0.95) 0.006                                   |
|                                   | Direct ICU admission   | 0.95 (0.09)                       | 1 (reference)                                    | 1 (reference)                                             |
|                                   | Indirect ICU admission | 1.33 (0.18)                       | 1.08 (0.96, 1.21) 0.196                          | 1.05 (0.89, 1.24) 0.530                                   |
| Age (years)                       | per 10 years           | -                                 | 1.42 (1.40, 1.44) <0.001                         | 1.19 (1.18, 1.21) <0.001                                  |
| Sex                               | Male                   | 0.53 (0.02)                       | 1 (reference)                                    | 1 (reference)                                             |
|                                   | Female                 | 0.63 (0.02)                       | 1.18 (1.13, 1.24) <0.001                         | 1.04 (0.98, 1.10) 0.218                                   |
| Comorbidity count (Charlson)      | 0                      | 0.43 (0.01)                       | 1 (reference)                                    | 1 (reference)                                             |
|                                   | 1                      | 1.83 (0.09)                       | 5.80 (5.48, 6.14) <0.001                         | 1.41 (1.35, 1.48) <0.001                                  |
|                                   | 2                      | 2.00 (0.15)                       | 8.04 (7.01, 9.22) <0.001                         | 1.18 (0.97, 1.43) 0.104                                   |
|                                   | 3+                     | 3.05 (0.37)                       | 15.38 (11.59, 20.43) <0.001                      | 1.71 (1.18, 2.48) 0.004                                   |
| Deprivation index quintile (SIMD) | 1 Least deprived       | 0.49 (0.03)                       | 1 (reference)                                    | 1 (reference)                                             |
|                                   | 2                      | 0.52 (0.02)                       | 1.10 (1.01, 1.19) 0.030                          | 1.07 (0.97, 1.18) 0.153                                   |
|                                   | 3                      | 0.57 (0.03)                       | 1.22 (1.13, 1.32) <0.001                         | 1.15 (1.10, 1.21) <0.001                                  |
|                                   | 4                      | 0.64 (0.03)                       | 1.36 (1.20, 1.54) <0.001                         | 1.28 (1.21, 1.36) <0.001                                  |
|                                   | 5 Most deprived        | 0.62 (0.03)                       | 1.41 (1.31, 1.51) <0.001                         | 1.48 (1.37, 1.59) <0.001                                  |
| Prior elective admission          | Mean (SD)              | -                                 | 1.47 (1.45, 1.49) <0.001                         | 1.07 (1.05, 1.08) <0.001                                  |
| Prior emergency admission         | Mean (SD)              | -                                 | 1.69 (1.67, 1.72) <0.001                         | 1.46 (1.43, 1.49) <0.001                                  |
| Diagnosis                         | Other                  | 0.50 (0.01)                       | 1 (reference)                                    | 1 (reference)                                             |
|                                   | Cancer                 | 2.42 (0.13)                       | 5.84 (5.49, 6.22) <0.001                         | 4.87 (4.52, 5.25) <0.001                                  |
|                                   | Trauma/Injury          | 0.19 (0.01)                       | 0.39 (0.36, 0.43) <0.001                         | 0.59 (0.56, 0.63) <0.001                                  |
| Procedure category                | Upper digestive system | 1.04 (0.08)                       | 1.17 (1.11, 1.23) <0.001                         | 0.95 (0.85, 1.06) 0.355                                   |
|                                   | Lower digestive system | 0.40 (0.01)                       | 0.42 (0.39, 0.45) <0.001                         | 0.66 (0.63, 0.70) <0.001                                  |
|                                   | Other abdomen          | 0.39 (0.03)                       | 0.37 (0.33, 0.42) <0.001                         | 0.49 (0.43, 0.56) <0.001                                  |
|                                   | Vascular               | 1.17 (0.08)                       | 1.52 (1.36, 1.69) <0.001                         | 1.14 (1.04, 1.25) 0.006                                   |
|                                   | Soft tissue            | 0.56 (0.03)                       | 0.49 (0.46, 0.53) <0.001                         | 0.91 (0.83, 1.00) 0.041                                   |
|                                   | Other                  | 0.88 (0.05)                       | 1 (reference)                                    | 1 (reference)                                             |
| Operative complexity              | Minor                  | 0.44 (0.02)                       | 1 (reference)                                    | 1 (reference)                                             |
|                                   | Intermediate           | 0.44 (0.01)                       | 0.91 (0.82, 1.02) 0.105                          | 0.82 (0.78, 0.86) <0.001                                  |
|                                   | Major                  | 0.70 (0.04)                       | 1.54 (1.30, 1.82) <0.001                         | 1.07 (0.96, 1.18) 0.231                                   |
|                                   | Major+                 | 1.06 (0.08)                       | 2.90 (2.49, 3.39) <0.001                         | 1.07 (0.88, 1.30) 0.521                                   |
|                                   | Complex major          | 0.94 (0.05)                       | 2.70 (2.28, 3.18) <0.001                         | 1.11 (0.95, 1.29) 0.177                                   |
| Discharge date                    | Mon-Thu                | 0.61 (0.02)                       | 1 (reference)                                    | 1 (reference)                                             |
|                                   | Fri-Sun                | 0.51 (0.02)                       | 0.85 (0.79, 0.91) <0.001                         | 1.02 (0.97, 1.06) 0.469                                   |
| Season                            | Dec-Feb                | 0.60 (0.03)                       | 1 (reference)                                    | 1 (reference)                                             |
|                                   | Mar-May                | 0.58 (0.02)                       | 1.08 (1.02, 1.15) 0.008                          | 1.03 (0.97, 1.09) 0.295                                   |
|                                   | Jun-Aug                | 0.55 (0.02)                       | 0.97 (0.91, 1.03) 0.275                          | 1.04 (1.00, 1.08) 0.043                                   |
|                                   | Sep-Nov                | 0.55 (0.03)                       | 0.93 (0.88, 0.99) 0.014                          | 0.99 (0.95, 1.04) 0.778                                   |

## **Additional supplementary material**

### **Expanded methods section**

This project was scrutinised by the Privacy Advisory Committee for issues relating to information governance, disclosivity and privacy. Scotland has clear guidance on principles of data linkage to ensure data are linked and analysed in an ethical and legal framework.<sup>(1)</sup> This guidance was developed with consultation and engagement with the Scottish public. Data linkage is undertaken centrally by Information Services Division of NHS Scotland using probabilistic matching methods. The fields used to undertake linkage include name, sex, date of birth, post code, date of death, and unique patient identifying numbers such as the Community Health Index number (a unique health care identifier in Scotland allocated to all Scottish residents). A computer algorithm is used to compare each field between two records and generate a score. This score depends on the agreement of the contents of the field and the rarity of the information. From this, the probability that the two records relate to the same person is calculated. This probability is the sum of weighted scores for each field. Records are only considered correct matches if the sum of the weighted scores is greater than a specified threshold value. Manual validation of linkages indicates that the accuracy of this method of data linkage is high.<sup>(2,3)</sup>

#### *General Surgical Procedures*

General surgical procedures were identified using the Office of Population Censuses and Surveys (OPCS) Classification of Surgical Operations version 4.2. General surgical procedures were defined as procedures from chapters:

- Chapter G - Upper Digestive System
- Chapter H - Lower Digestive System
- Chapter J - Other Abdominal Organs, Principally Digestive
- Chapter L - Arteries and Veins
- Chapter M - Urinary
- Chapter N - Male Genital Organs
- Chapter B - Endocrine System and Breast
- Chapter S - Skin
- Chapter T - Soft Tissue
- Chapter X - Miscellaneous Operations
- Chapter Y - Subsidiary Classification of Methods of Operation

#### *Readmission Diagnosis*

Readmission diagnosis was recorded using ICD-10 system and these were grouped under broad themes by two authors (MAG, SG) and this was reviewed and adjudicated by a further two authors (NIL, EMH). Final groupings were as outlined below:

## **Cardiovascular/Cerebrovascular**

I10-15 – hypertensive heart and renal disease  
I20-25, I50 – Ischaemic heart disease – includes complications of MI  
I30-32 – Pericarditis  
I33, I38, I39 – Endocarditis  
I40-41 – Myocarditis  
I42-43 – Cardiomyopathy  
I44-45 – Conduction Disorders  
I46 – Cardiac Arrest  
I47-49 – Arrhythmias  
I50 – Heart Failure  
I60 – SAH  
I61 – Intracerebral Haemorrhage  
I62 – Non-traumatic ICH  
I63-64 – CVA

## **Respiratory**

J00-06 – Acute URTI, incl. pharyngitis and sinusitis  
J09-11 – Influenza  
J12 – Viral Pneumonia  
J13-15 – Bacterial Pneumonia  
J16 – Pneumonia due to other organisms – chlamydial, other specified  
J18 – Pneumonia – organism unspecified  
J20 – Acute bronchitis  
J40-47 – Chronic LRTIs

- Bronchitis, Emphysema, COPD, Asthma, Status asthmaticus, Bronchiectasis

J80 – ARDS  
J81 – Pulmonary oedema (excluding cardiac causes)  
J90-91 – Pleural effusion  
J93 – Pneumothorax  
J96 – acute respiratory failure

## **Gastrointestinal**

K20-21 – Oesophagitis, GORD  
K22 – Barret's, Oesophageal ulcer  
K25-27, 29 – Peptic ulcer  
K55 – Acute vascular disorders of intestine, including ischaemic bowel  
K56 – Paralytic ileus

- Incl. volvulus and adhesions

K65 – peritonitis  
K66 – Other disorders of peritoneum, including adhesions and haemoperitoneum  
K71 – toxic liver disease, including drugs and cholestasis  
K85 – Acute pancreatitis  
K91 – Post-procedural disorders of digestive system

- Incl. vomiting, malabsorption, obstruction, stoma malfunction
- K92 – Other disorders of the digestive system
- Haematemesis, melena, GI haemorrhage

## **Renal**

- N02 – Persistent haematuria  
 N10 – Acute tubulo-interstitial nephritis  
 N13 – Obstructive and reflex uropathy, including hydronephrosis  
 N14 – drug-induced tubulo-interstitial and tubular disease  
 N17 – Acute renal failure  
 N18 – CKD  
 N19 – Unspecified kidney failure  
 N20-23 – Urolithiasis  
 N30 - Cystitis  
 N39 – UTI  
 N99 – Post-procedural disorders of the genitourinary system
- Incl. renal failure, urethral stricture, malfunction of urostomy

## **Infection**

- A40 – Streptococcal Infection/sepsis
- Strep A, B, D
  - Strep Pneumoniae
  - Other specified or unspecified strep infections
- A41 – Other sepsis
- Staph, Haemophilus, Anaerobes, Gram negative
  - Other specified or unspecified
- A48 – Other bacterial diseases (not elsewhere classified)
- Gas gangrene – cellulitis
  - Legionnaire's
  - Toxic Shock Syndrome
- A49 – Bacterial Infection of unspecified site  
 B95 – Staphylococcus and Streptococcus as the cause of diseases classified to other chapters  
 B96 – Other specified bacterial agents as the cause of diseases classified to other chapters (Klebsiella, Haemophilus, Pseudomonas, E. Coli etc)

## **Surgical Complications**

- T81.0 – Haemorrhage and haematoma complicating a procedure  
 T81.2 – Accidental puncture and laceration during a procedure, not elsewhere classified  
 T81.3 – Disruption of operation wound, not elsewhere classified  
 T81.4 – Infection following a procedure, not elsewhere classified – incl. wound  
 T81.5 – Foreign body accidentally left in body cavity or operation wound following a procedure

T81.8 – Other complications of a procedure, not elsewhere classified – including persistent postoperative fistula

T81.9 – Unspecified complication of procedure

### **Thromboembolic**

I80 – phlebitis and thrombophlebitis

- I80.0 – superficial vessels of lower extremities
- I80.1 – femoral vein
- I80.2 – deep vessel of lower extremities
- I80.3 – lower extremities, unspecified
- I80.8 – Other sites
- I80.9 – unspecified site

I26 – PE

### **Others**

D50 – Iron deficiency anaemia

D59 – Acquired haemolytic anaemia

D65 – DIC

D68.3 – Haemorrhagic disorder due to circulating anticoagulants

D68.4 – Acquired coagulation factor deficiency (liver disease, Vitamin K deficiency)

D69 – Purpura and other haemorrhagic conditions

- Thrombocytopenia

D70 – Agranulocytosis (neutropenia)

D80-89 – Immunodeficiency

E10-14 – DKA

E20-35 – Disorders of other thyroid glands

- Includes hypo and hyper secretion of glands, and Addisonian Crisis

L03 – Cellulitis

L08 – Other local infections of skin and subcutaneous tissue

L50 – Allergic urticarial

M00-03 – Infective arthropathies

### **References**

1. Kendrick S, Clarke J. The Scottish Record Linkage System. Health Bull (Raleigh). Information and Statistics Division, Scottish Health Service, Edinburgh.; 1993 Mar;51(2):72–9.
2. Division IS. NHS Hospital Data Quality: Towards better data from Scottish hospitals. Edinburgh: ISD Publications Scotland; 2007.
3. Division IS. Assessment of SMR01 Data 2010-11 Scotland Report. Edinburgh: ISD Publications Scotland; 2012.
